# Supplementary material
Source: publisher figshare collection journal article supplement (https://acs.figshare.com/ndownloader/files/3862840)
Supplement: Supplementary file 1 [file 3862840]

## Supporting Information

### Investigation Regarding the Role of Chloride in Organic-Inorganic Halide Perovskites Obtained from Chloride Containing Precursors

*M. Ibrahim Dar,<sup>\*a</sup> Neha Arora,<sup>a</sup> Peng Gao,<sup>a</sup> Shahzada Ahmad,<sup>b</sup> Michael Grätzel<sup>\*a</sup> and Mohammad Khaja Nazeeruddin<sup>\*a</sup>*

<sup>a</sup>Laboratory of Photonics and Interfaces, Institute of Chemical Sciences and Engineering, Swiss Federal Institute of Technology (EPFL), Station 6, 1015 Lausanne, Switzerland

<sup>b</sup>Abengoa Research, C/ Energía Solar n° 1, Campus Palmas Altas-41014, Sevilla, Spain

E-mail: mdkhaja.nazeeruddin@epfl.ch, michael.graetzel@epfl.ch, ibrahim.dar@epfl.ch; Fax: (+) 41-216936100

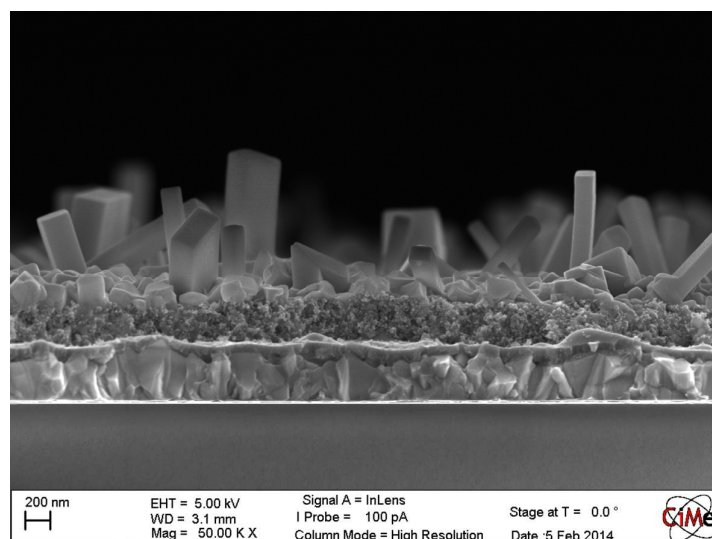

**Figure S1.** Cross-sectional SEM micrograph of **P1** sample.

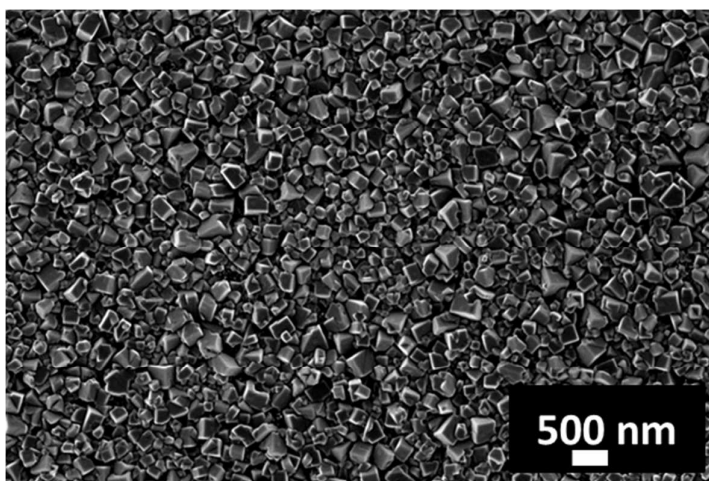

**Figure S2.** SEM image displaying the top view of  $\text{CH}_3\text{NH}_3\text{PbI}_3$  structures of **P4** sample.

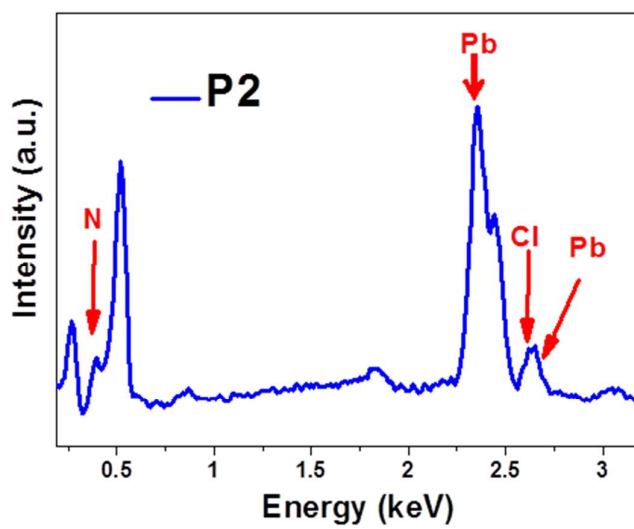

**Figure S3.** EDS spectrum of **P2** sample.

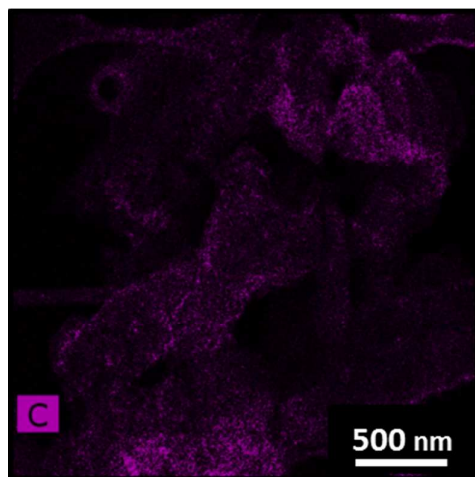

**Figure S4.** STEM-EDS analysis based C map of CH<sub>3</sub>NH<sub>3</sub>PbI<sub>3</sub> asymmetric crystals (**P2**).

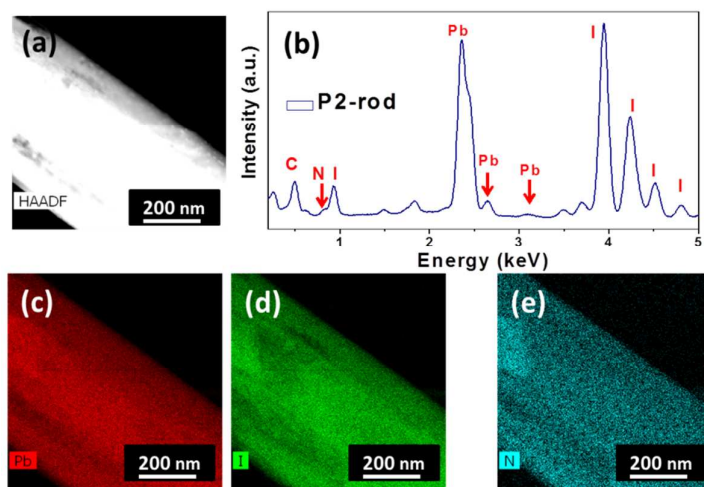

**Figure S5.** STEM-EDS analysis of **P2-rod**; (a) STEM-HAADF image, (b) STEM-EDS spectrum, (c) Pb map, (d) I map, and (e) N map.

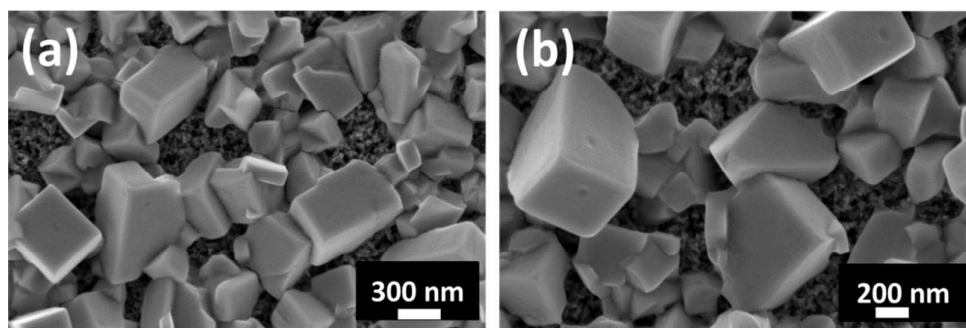

**Figure S6.** SEM image displaying the top view of  $\text{CH}_3\text{NH}_3\text{PbI}_3$  structures obtained after dipping the  $\text{PbI}_2$  film into a solution containing 8 mg/mL of MAI in 1 mL of IPA for 30 minutes.

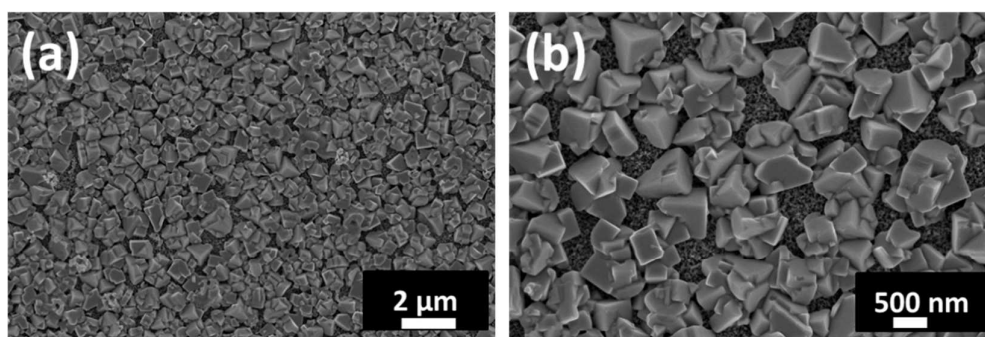

**Figure S7.** SEM image displaying the top view of  $\text{CH}_3\text{NH}_3\text{PbI}_3$  structures obtained after dipping the  $\text{PbI}_2$  film into a solution containing 7.6 mg of MAI in 1 mL of IPA for 4 minutes.
